# Supplementary material for: Theoretical study of the effects of alloying elements on TiO2/Ti2AlNb interface adhesion properties
Source: Royal Society of Chemistry journal article supplement (doi:10.1039/d3cp04727j), 2024-01-01
Supplement: d3cp04727j1.pdf [file d3cp04727j1.pdf]

## Supplementary Material

Theoretical Study on the Effects of Alloying Elements on TiO<sub>2</sub>/Ti<sub>2</sub>AlNb Interface Adhesion Properties

Y. Li<sup>1</sup>, B. Shi<sup>2\*</sup>, J.H. Dai<sup>1\*</sup>, Y. Song<sup>1</sup>

<sup>1</sup>School of Materials Science and Engineering, Harbin Institute of Technology at Weihai, 2 West Wenhua Road, Weihai, 264209, China, daijh@hit.edu.cn

<sup>2</sup> Shandong Provincial Key Lab of Special Welding Technology, Harbin Institute of Technology at Weihai, 2 West Wenhua Road, Weihai, 264209, China, shibin@hit.edu.cn

This Supplementary Material includes seven Supplementary Figures:

Figure S1. Convergence of cutoff energy and k-mesh

Figure S2.  $W_{sep}$ -distance curve and stress-strain curve of normal separation process of alloying elements doped TiO<sub>2</sub>/Ti<sub>2</sub>AlNb interface

Figure S3.  $W_{sep}$ -distance curve and stress-strain curve of tangential separation process of alloying elements doped TiO<sub>2</sub>/Ti<sub>2</sub>AlNb interface

Figure S4. Differential charge densities of the bare TiO<sub>2</sub>/Ti<sub>2</sub>AlNb interface during normal separation

Figure S5. Differential charge densities of the Si element doped (Nb substituted) TiO<sub>2</sub>/Ti<sub>2</sub>AlNb interface during normal separation

Figure S6. Differential charge densities of the Hf element doped (Nb substituted) TiO<sub>2</sub>/Ti<sub>2</sub>AlNb interface during normal separation

Figure S7. The relaxation process of first-principles molecular dynamics

Figure S8. Structural changes of the TiO<sub>2</sub>/Ti<sub>2</sub>AlNb interface at 1100K

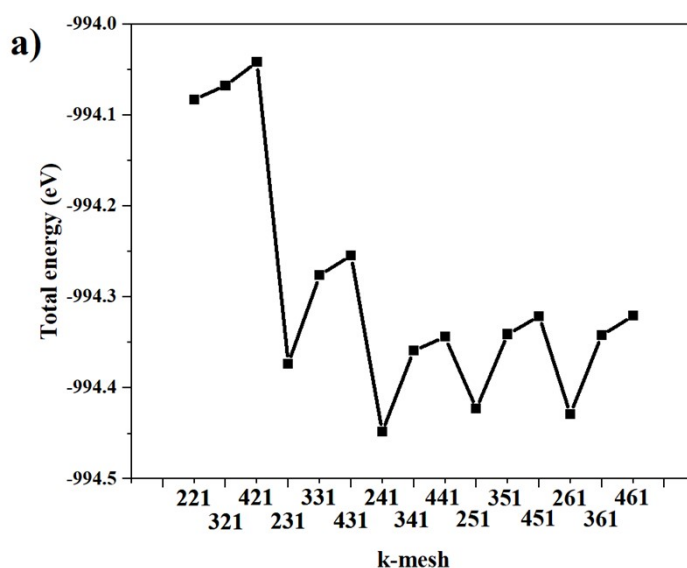

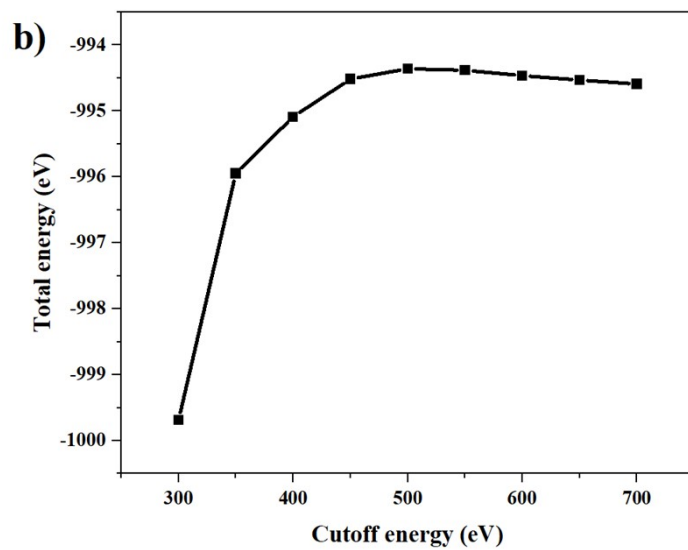

Fig. 1 Convergence of cutoff energy and k-mesh

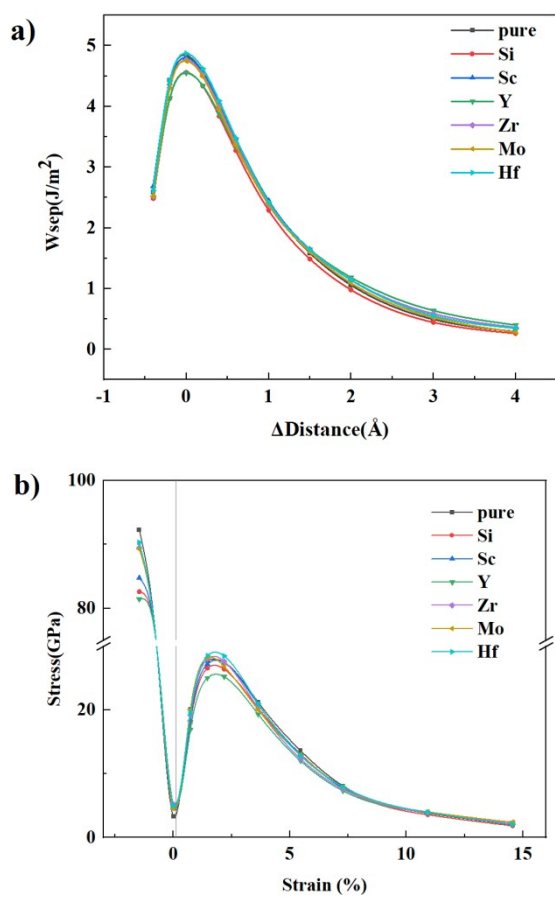

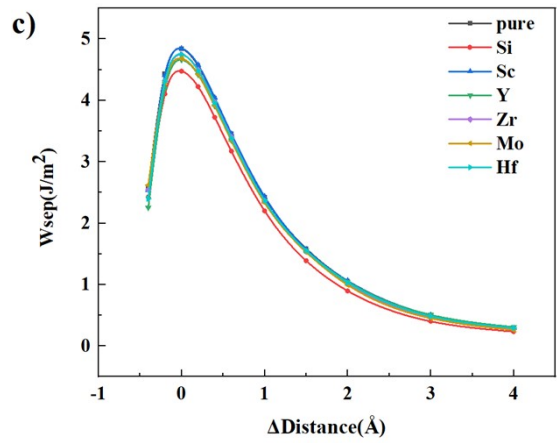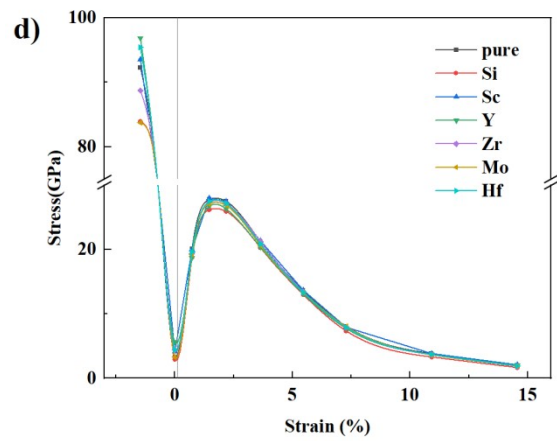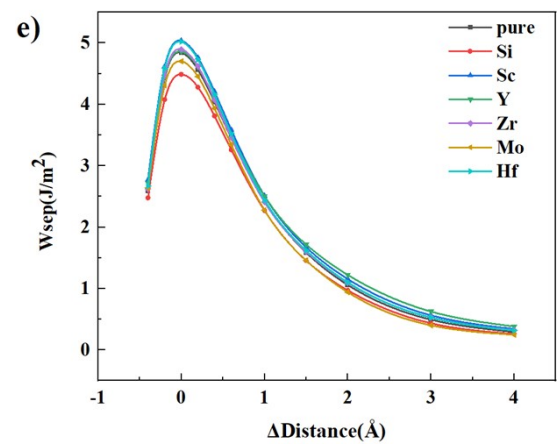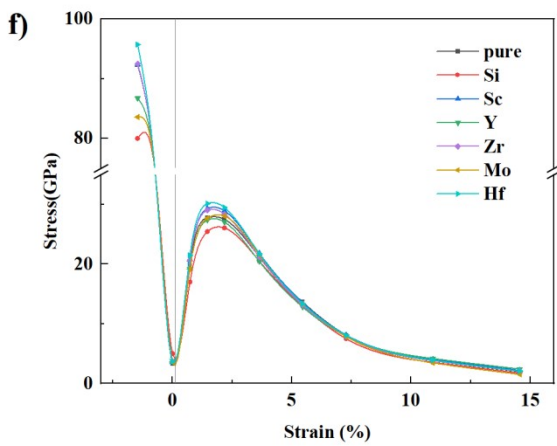

Fig. 2 a)  $W_{sep}$ -distance curve and b) stress-strain curve of normal separation process of alloying elements doped (Al substituted)  $\text{TiO}_2/\text{Ti}_2\text{AlNb}$  interface, c)  $W_{sep}$ -distance curve and d) stress-strain curve of normal separation process of alloying elements doped (Ti substituted)  $\text{TiO}_2/\text{Ti}_2\text{AlNb}$  interface, e)  $W_{sep}$ -distance curve and f) stress-strain curve of normal separation process of alloying elements doped (Nb substituted)  $\text{TiO}_2/\text{Ti}_2\text{AlNb}$  interface

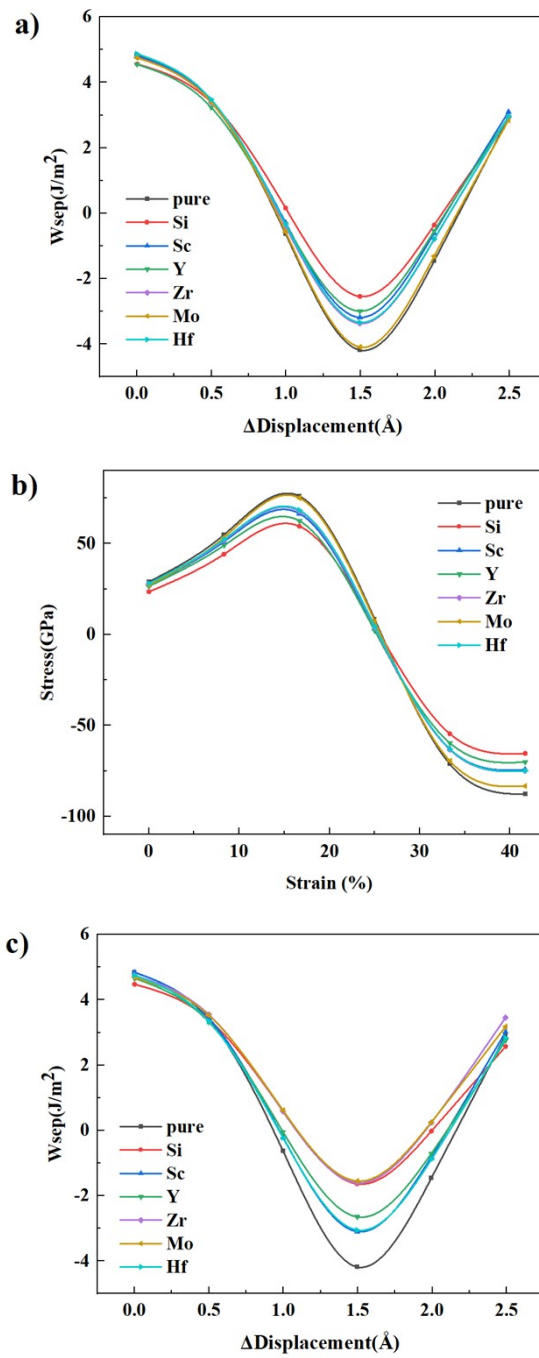

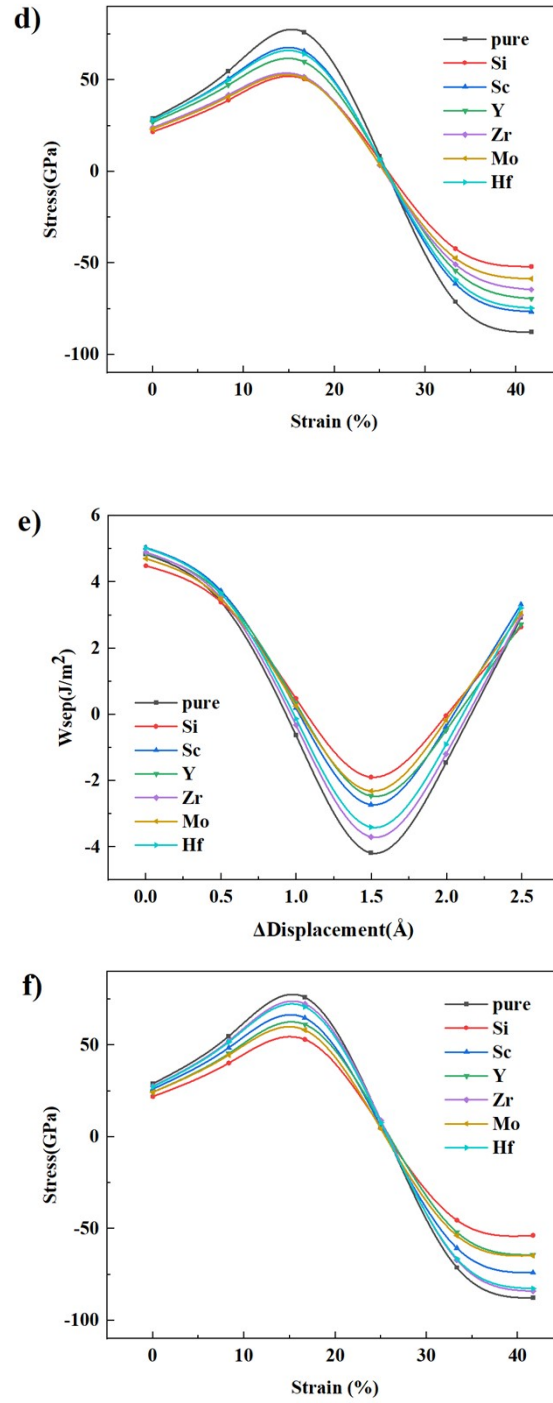

Fig. 3 a)  $W_{sep}$ -distance curve and b) stress-strain curve of tangential separation process of alloying elements doped (Al substituted)  $\text{TiO}_2/\text{Ti}_2\text{AlNb}$  interface, c)  $W_{sep}$ -distance curve and d) stress-strain curve of tangential separation process of alloying elements doped (Ti substituted)  $\text{TiO}_2/\text{Ti}_2\text{AlNb}$  interface, e)  $W_{sep}$ -distance curve and f) stress-strain curve of tangential separation process of alloying elements doped (Nb substituted)  $\text{TiO}_2/\text{Ti}_2\text{AlNb}$  interface

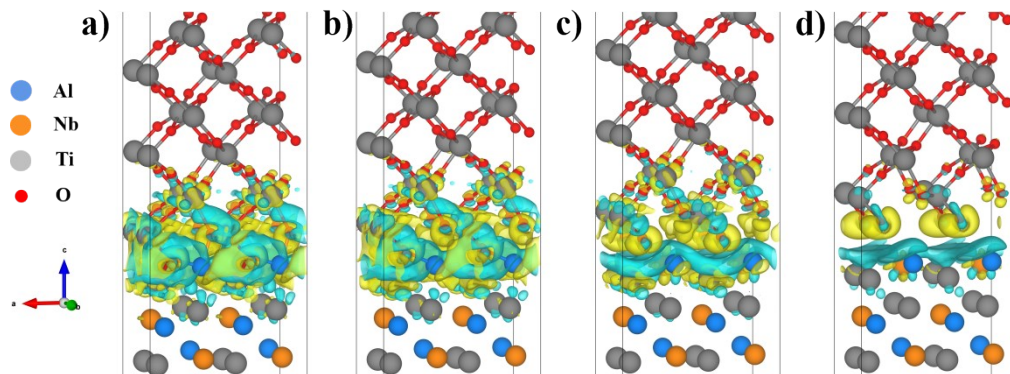

Fig. 4 Differential charge densities of the bare  $\text{TiO}_2/\text{Ti}_2\text{AlNb}$  interface during normal separation, a) Strain value of 0%, b) Strain value of 1.46%, c) Strain value of 3.65%, d) Strain value of 7.3%

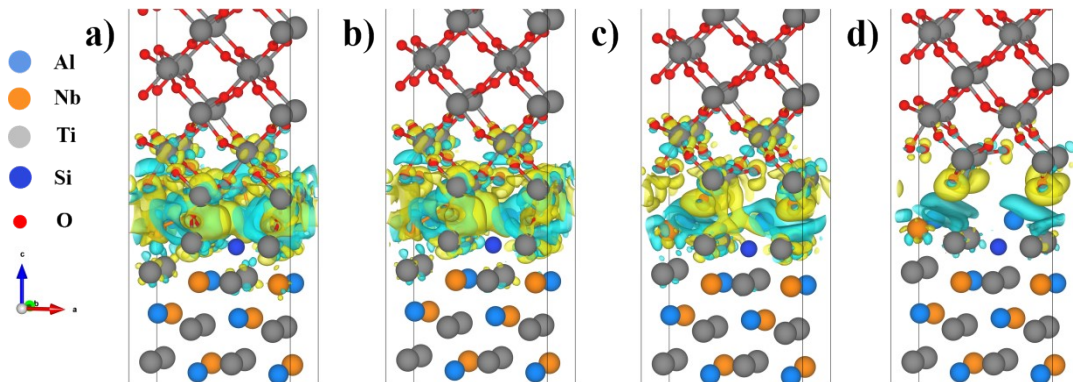

Fig. 5 Differential charge densities of the Si element doped (Nb substituted)  $\text{TiO}_2/\text{Ti}_2\text{AlNb}$  interface during normal separation, a) Strain value of 0%, b) Strain value of 1.46%, c) Strain value of 3.65%, d) Strain value of 7.3%

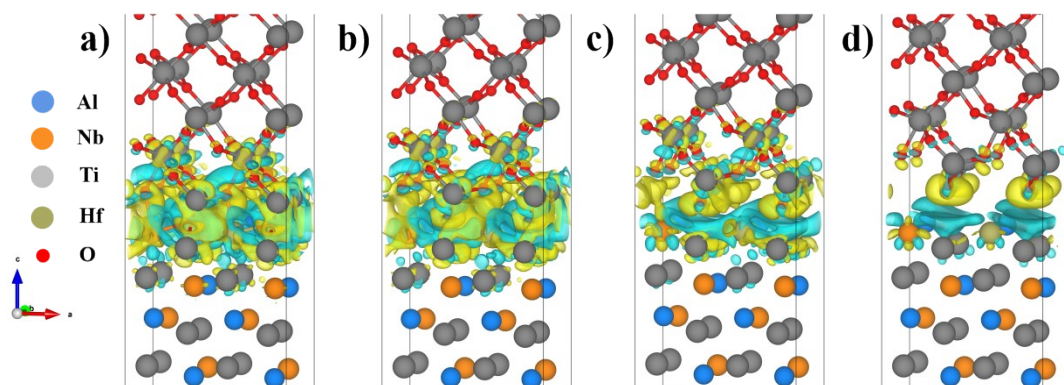

Fig. 6 Differential charge densities of the Hf element doped (Nb substituted)  $\text{TiO}_2/\text{Ti}_2\text{AlNb}$  interface during normal separation, a) Strain value of 0%, b) Strain value of 1.46%, c) Strain value of 3.65%, d) Strain value of 7.3%

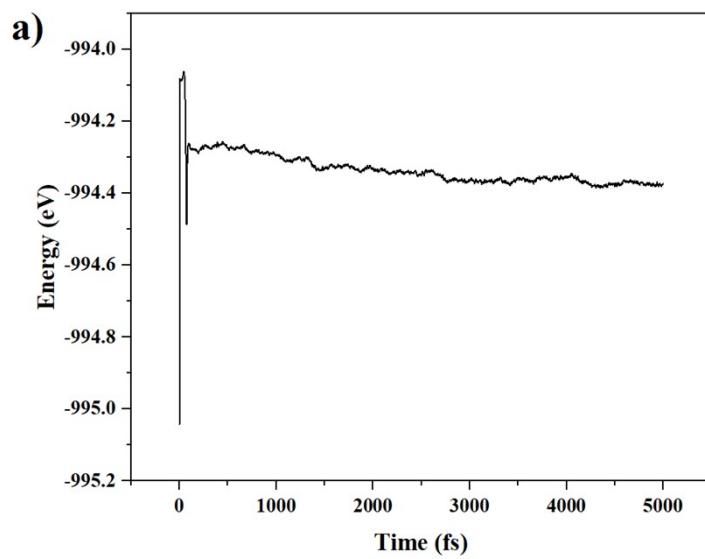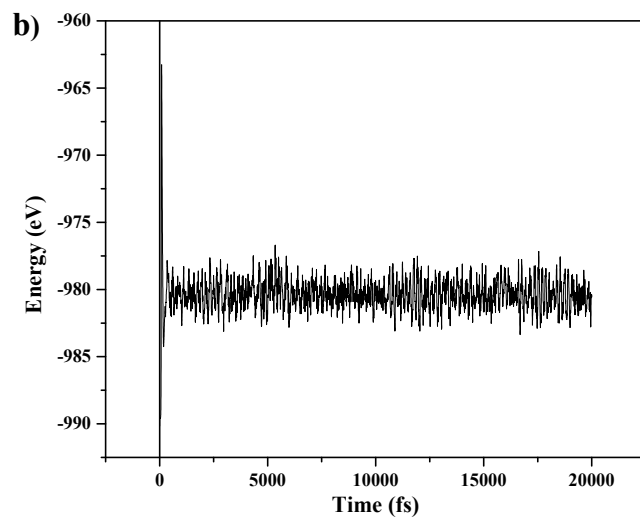

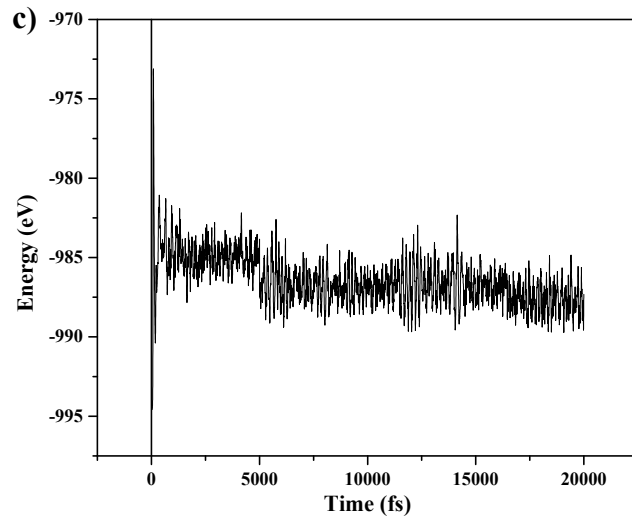

Fig. 7 The relaxation process of first-principles molecular dynamics, a) the bare  $\text{TiO}_2/\text{Ti}_2\text{AlNb}$  interface, b) the Si doped  $\text{TiO}_2/\text{Ti}_2\text{AlNb}$  interface, c) the Hf doped  $\text{TiO}_2/\text{Ti}_2\text{AlNb}$  interface

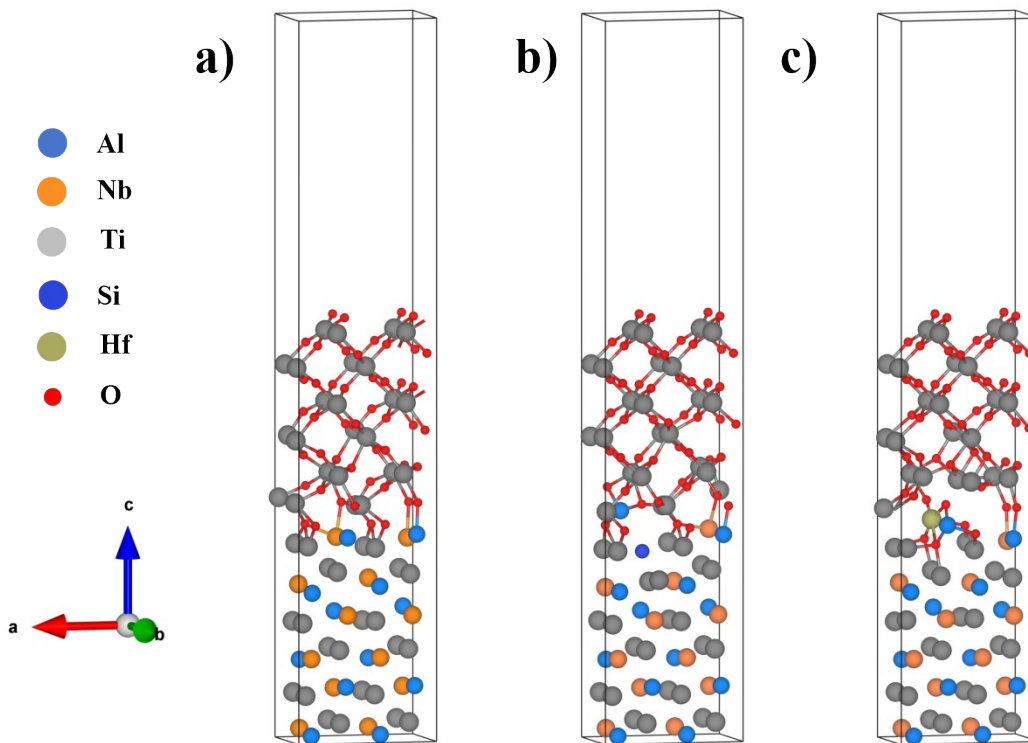

Fig. 8 Structural changes of the  $\text{TiO}_2/\text{Ti}_2\text{AlNb}$  interface at 1100K, a) the bare  $\text{TiO}_2/\text{Ti}_2\text{AlNb}$  interface, b) the Si doped  $\text{TiO}_2/\text{Ti}_2\text{AlNb}$  interface, c) the Hf doped  $\text{TiO}_2/\text{Ti}_2\text{AlNb}$  interface
